# Supplementary material for: Thinking about it: the impact of COVID-19-related stimuli on prospective memory
Source: PeerJ journal article supplement (doi:10.7717/peerj.16389), 2023-11-16
Supplement: Questionnaire_ITA_ENG.pdf [file Questionnaire_ITA_ENG.pdf]

## ITALIAN VERSION

### I. Questionario – Parte 1

Demographics

Età (anni):

-----

Genere:

Femmina

Maschio

Altro: \_\_\_\_\_

-----

Titolo di studio:

-----

Negli ultimi due anni, hai vissuto la maggior parte del tempo in Italia?

Sì

No

-----

Indica in che regione e in che provincia:

Regione

Provincia

---

Start of Block: Domande legate al benessere (ansia e depressione)

Hai mai avuto patologie di tipo neurologico (trauma cranico, ischemie) o psichiatrico (disturbi di personalità, depressione)?

- Sì, di tipo neurologico
  - Sì, di tipo psichiatrico
  - No, mai
  - Sì, entrambe
- 

Specifica quale patologia:

- Ictus o cerebrolesioni acquisite
  - Morbo di Parkinson
  - Morbo di Alzheimer
  - Sclerosi Multipla
  - Altro (*specifica*): \_\_\_\_\_
-

Specifica quale patologia:

- Disturbi dell'umore (depressione, disturbo bipolare)
  - Disturbi di personalità
  - Disturbi d'ansia
  - Disturbi ossessivo compulsivo
  - Disturbi psicotici
  - Disturbi alimentari
  - Altro (*specifica*): \_\_\_\_\_
- 

Attualmente assumi psicofarmaci?

- Sì
- No

Le seguenti domande si riferiscono al tuo stato di BENESSERE

ISTRUZIONI: Per favore, leggi ogni frase e indica con quale frequenza la situazione descritta si è verificata negli ultimi sette giorni. Tieni presente che non esistono risposte giuste o sbagliate. Non impiegare troppo tempo per rispondere a ciascuna affermazione, spesso la prima risposta è la più accurata.

|                                                                                                                                                               | <b>Non mi è mai<br/>accaduto</b> | <b>Qualche volta</b>  | <b>Con una certa<br/>frequenza</b> | <b>Quasi sempre</b>   |
|---------------------------------------------------------------------------------------------------------------------------------------------------------------|----------------------------------|-----------------------|------------------------------------|-----------------------|
| 1. Ho provato molta tensione e ho avuto difficoltà a recuperare uno stato di calma                                                                            | <input type="radio"/>            | <input type="radio"/> | <input type="radio"/>              | <input type="radio"/> |
| 2. Mi sono accorto/a di avere la bocca secca                                                                                                                  | <input type="radio"/>            | <input type="radio"/> | <input type="radio"/>              | <input type="radio"/> |
| 3. Non riesco proprio a provare delle emozioni positive                                                                                                       | <input type="radio"/>            | <input type="radio"/> | <input type="radio"/>              | <input type="radio"/> |
| 4. Mi sono sentito/a molto in affanno con difficoltà a respirare (per es., respiro molto accelerato, sensazione di forte affanno in assenza di sforzo fisico) | <input type="radio"/>            | <input type="radio"/> | <input type="radio"/>              | <input type="radio"/> |
| 5. Ho avuto un'estrema difficoltà nel cominciare quello che dovevo fare                                                                                       | <input type="radio"/>            | <input type="radio"/> | <input type="radio"/>              | <input type="radio"/> |
| 6. Ho avuto la tendenza a reagire in maniera eccessiva alle situazioni                                                                                        | <input type="radio"/>            | <input type="radio"/> | <input type="radio"/>              | <input type="radio"/> |

|                                                                                                                    |                       |                       |                       |                       |
|--------------------------------------------------------------------------------------------------------------------|-----------------------|-----------------------|-----------------------|-----------------------|
| 7. Ho avuto tremori (per es. alle mani)                                                                            | <input type="radio"/> | <input type="radio"/> | <input type="radio"/> | <input type="radio"/> |
| 8. Ho sentito che stavo impiegando molta energia nervosa                                                           | <input type="radio"/> | <input type="radio"/> | <input type="radio"/> | <input type="radio"/> |
| 9. Ho temuto di trovarmi in situazioni in cui sarei potuto andare nel panico e rendermi ridicolo                   | <input type="radio"/> | <input type="radio"/> | <input type="radio"/> | <input type="radio"/> |
| 10. Non vedevo nulla di buono nel mio futuro                                                                       | <input type="radio"/> | <input type="radio"/> | <input type="radio"/> | <input type="radio"/> |
| 11. Mi sono sentito/a stressato/a                                                                                  | <input type="radio"/> | <input type="radio"/> | <input type="radio"/> | <input type="radio"/> |
| 12. Ho avuto difficoltà a rilassarmi                                                                               | <input type="radio"/> | <input type="radio"/> | <input type="radio"/> | <input type="radio"/> |
| 13. Mi sono sentito/a scoraggiato/a e depresso/a                                                                   | <input type="radio"/> | <input type="radio"/> | <input type="radio"/> | <input type="radio"/> |
| 14. Non riesco a tollerare per nulla eventi o situazioni che mi impedivano di portare avanti ciò che stavo facendo | <input type="radio"/> | <input type="radio"/> | <input type="radio"/> | <input type="radio"/> |
| 15. Ho sentito di essere vicino ad avere un attacco di panico                                                      | <input type="radio"/> | <input type="radio"/> | <input type="radio"/> | <input type="radio"/> |
| 16. Non c'era nulla che potesse darmi entusiasmo                                                                   | <input type="radio"/> | <input type="radio"/> | <input type="radio"/> | <input type="radio"/> |

|                                                                                                                                                           |                       |                       |                       |                       |
|-----------------------------------------------------------------------------------------------------------------------------------------------------------|-----------------------|-----------------------|-----------------------|-----------------------|
| 17. Sentivo di valere poco come persona                                                                                                                   | <input type="radio"/> | <input type="radio"/> | <input type="radio"/> | <input type="radio"/> |
| 18. Mi sono sentito/a piuttosto irritabile                                                                                                                | <input type="radio"/> | <input type="radio"/> | <input type="radio"/> | <input type="radio"/> |
| 19. Ho percepito distintamente il battito del mio cuore senza aver fatto uno sforzo fisico (per es., battito cardiaco accelerato o perdita di un battito) | <input type="radio"/> | <input type="radio"/> | <input type="radio"/> | <input type="radio"/> |
| 20. Mi sono sentito/a spaventato/a senza ragione                                                                                                          | <input type="radio"/> | <input type="radio"/> | <input type="radio"/> | <input type="radio"/> |
| 21. Sentivo la vita priva di significato                                                                                                                  | <input type="radio"/> | <input type="radio"/> | <input type="radio"/> | <input type="radio"/> |

## II. TASK: Link to the Pavlovia Page

---

Start of Block: Link to the task (video inside)

Ti chiedo di inserire qui un codice alfanumerico (ID\_Soggetto) col quale verrai identificato, in forma del tutto anonima. Il codice, che dovrai inserire anche all'inizio del compito che troverai al link sottostante, deve essere composto da: iniziali del tuo nome e cognome, età, genere col quale ti identifichi (inserisci M, F, o A per altro) e giorno del mese in cui stai svolgendo l'esperimento (es. Mario Rossi, età 23, sesso M, esperimento svolto il 3 ottobre: MR23M3).

---

Ecco il link per accedere all'esperimento:

[https://run.pavlovia.org/Stefano\\_PhD/thai\\_nega/html](https://run.pavlovia.org/Stefano_PhD/thai_nega/html)

Ricorda, alla voce ID\_Soggetto inserisci il codice che hai appena inserito! Quando hai terminato il compito, torna su questa schermata per qualche ultima domanda.

---

## III. Questionario – Parte 2

Experience with the pandemic

Hai mai contratto il COVID-19?

- SI
- NO
- 

Hai il COVID-19 in questo momento?

- SI
- NO
-

Quali sintomi hai/hai avuto associati al COVID-19? (*è possibile selezionare più risposte*)

Febbre

Tosse

Difficoltà respiratorie

Senso di stanchezza/ debolezza

Nessuno di questi sintomi

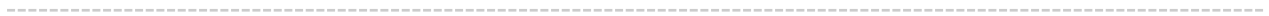



Hai avuto altri sintomi relativi al COVID-19? (è possibile selezionare più risposte)

- Indolenzimento e dolori muscolari
  - Congestione nasale
  - Naso che cola
  - Mal di gola
  - Diarrea
  - Difficoltà nel sentire gli odori
  - Difficoltà nel sentire i gusti
  - Maggiore o minore sensibilità tattile
  - Difficoltà uditive
  - Difficoltà visive (come “vedere doppio”, occhi arrossati/ secchi, lacrimazione frequente)
  - Nessuno di questi sintomi
-

In che condizione ti trovi attualmente a seguito dell'emergenza sanitaria da COVID-19?

- Nessuna restrizione (zona bianca)
  - Posso uscire di casa seppur con alcuni limiti/ restrizioni (zona gialla/arancione)
  - Posso uscire di casa solo se strettamente necessario (zona rossa)
  - Non posso uscire di casa (isolamento domiciliare totale/ quarantena)
- 

Da quanti giorni sei in isolamento/ quarantena?

---

Quanto hai paura di essere contagiato dal COVID-19?

- Per nulla
  - Poca
  - Moderata
  - Abbastanza
  - Molta
- 

Con che frequenza cerchi informazioni a riguardo?

- Mai
  - Raramente
  - Una volta alla settimana
  - Più volte la settimana
  - Ogni giorno
- 

Conosci qualcuno che abbia contratto il COVID-19?

|                       | SI                    | NO                    |
|-----------------------|-----------------------|-----------------------|
| Familiare/i o partner | <input type="radio"/> | <input type="radio"/> |
| Amico/i               | <input type="radio"/> | <input type="radio"/> |
| Conoscente/i          | <input type="radio"/> | <input type="radio"/> |

---

Conosci qualcuno che sia deceduto a causa del COVID-19?

|                       | SI                    | NO                    |
|-----------------------|-----------------------|-----------------------|
| Familiare/i o partner | <input type="radio"/> | <input type="radio"/> |
| Amico/i               | <input type="radio"/> | <input type="radio"/> |
| Conoscente/i          | <input type="radio"/> | <input type="radio"/> |

---

Hai fatto il vaccino anti-COVID-19?

- Sì, ho completato il primo ciclo e ho ricevuto anche la terza dose
- Sì, ho completato il ciclo di vaccinazione (due dosi)
- Sì, ma non ho ancora completato il ciclo (una dose su due)
- No, ma ho in programma di vaccinarci
- No, non ho intenzione di vaccinarci

Le seguenti domande si riferiscono al tuo stato di BENESSERE

ISTRUZIONI: Facendo riferimento alla situazione attuale, caratterizzata dall'epidemia di COVID-19 e dalle misure di distanziamento sociale messe in atto per contenerla, indica come ti senti per ciascuna delle seguenti dimensioni.

|                                                                                                                         | Per niente            | Un po'                | Moderatamente         | Abbastanza            | Estremamente          |
|-------------------------------------------------------------------------------------------------------------------------|-----------------------|-----------------------|-----------------------|-----------------------|-----------------------|
| 1. Avere pensieri ripetuti, inquietanti e indesiderati relativi a questa esperienza stressante                          | <input type="radio"/> | <input type="radio"/> | <input type="radio"/> | <input type="radio"/> | <input type="radio"/> |
| 2. Avere sogni ripetuti e inquietanti relativi a questa esperienza stressante                                           | <input type="radio"/> | <input type="radio"/> | <input type="radio"/> | <input type="radio"/> | <input type="radio"/> |
| 3. Sentirsi molto turbato                                                                                               | <input type="radio"/> | <input type="radio"/> | <input type="radio"/> | <input type="radio"/> | <input type="radio"/> |
| 4. Avere forti reazioni fisiche pensando a questa esperienza stressante (es. cuore martellante, difficoltà a respirare) | <input type="radio"/> | <input type="radio"/> | <input type="radio"/> | <input type="radio"/> | <input type="radio"/> |
| 5. Cercare di evitare pensieri e sentimenti legati a questa esperienza stressante                                       | <input type="radio"/> | <input type="radio"/> | <input type="radio"/> | <input type="radio"/> | <input type="radio"/> |
| 6. Avere difficoltà a                                                                                                   | <input type="radio"/> | <input type="radio"/> | <input type="radio"/> | <input type="radio"/> | <input type="radio"/> |

pensare ad  
aspetti diversi  
da questa  
situazione  
stressante

7. Avere  
difficoltà a  
concentrarti

    

8. Avere  
problemi ad  
addormentarti

    

9. Avere un  
sonno  
disturbato

    

---

Page Break

L'attuale pandemia ha modificato vari aspetti della nostra quotidianità. Come valuteresti l'impatto del COVID-19 sui seguenti aspetti della tua vita?

Dai una valutazione su una scala che va da 0 (nessun impatto) a 5 (molto impatto).

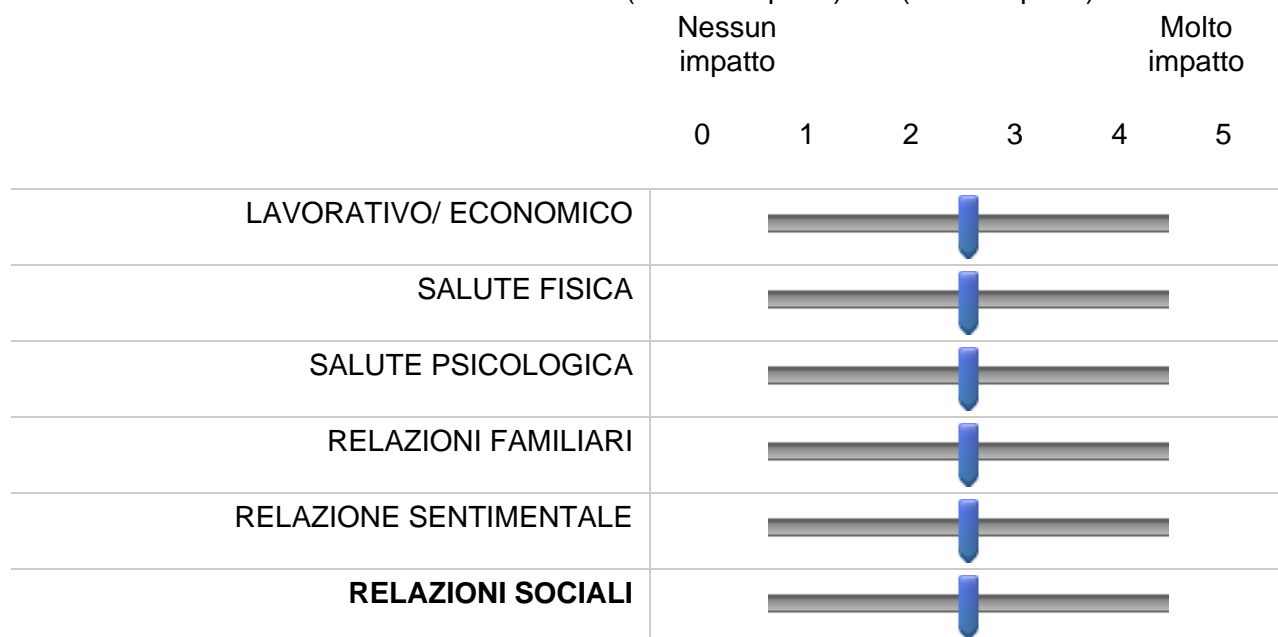

Sei mai stato seguito a livello psicologico prima della pandemia?

- SI
- NO

Hai cercato un aiuto psicologico durante la pandemia?

- SI
- NO

Vorresti cercare un aiuto psicologico in futuro?

- SI
- NO

## ENGLISH VERSION

### I. Questionnaire – Part 1

Demographics

Age (years):

---

Gender:

Female

Male

Other: \_\_\_\_\_

---

Highest degree/qualification:

---

Did you live most of the last two years (2020-2021) in Italy?

Yes

No

---

If so, please select the region and province you spent the most of your last two years:

Region:

Province:



---

Start of Block: Domande legate al benessere (ansia e depressione)

Did you ever suffer from neurological (head trauma, ictus) or psychiatric conditions (depression, personality disorders)?

- Yes, neurological conditions
  - Yes, psychiatric conditions
  - No, never
  - Both
- 

Please specify which condition:

- Ictus or other acquired cerebral lesions
  - Parkinson's Disease
  - Alzheimer's Disease
  - Multiple Sclerosis
  - Other (*specify*): \_\_\_\_\_
-

Please specify which condition:

- Mood Disorders (depression, bipolar disorder)
  - Personality Disorders
  - Anxiety Disorders
  - Obsessive-Compulsive Disorder
  - Psychotic Disorders
  - Eating Disorders
  - Other (*specify*): \_\_\_\_\_
- 

Are you currently assuming psychiatric drugs?

- Yes
- No

The following questions refer to your level of well-being.

ISTRUZIONI: Please read each statement and indicate how often the statement applied to you over the past week. There are no right or wrong answers. Do not spend too much time on any statement.

|                                                                                                                               | Never                 | Sometimes             | Often                 | Always /<br>Almost all the<br>time |
|-------------------------------------------------------------------------------------------------------------------------------|-----------------------|-----------------------|-----------------------|------------------------------------|
| 1. I found it hard to wind down                                                                                               | <input type="radio"/> | <input type="radio"/> | <input type="radio"/> | <input type="radio"/>              |
| 2. I was aware of dryness of my mouth                                                                                         | <input type="radio"/> | <input type="radio"/> | <input type="radio"/> | <input type="radio"/>              |
| 3. I couldn't seem to experience any positive feeling at all                                                                  | <input type="radio"/> | <input type="radio"/> | <input type="radio"/> | <input type="radio"/>              |
| 4. I experienced breathing difficulty (e.g., excessively rapid breathing, breathlessness in the absence of physical exertion) | <input type="radio"/> | <input type="radio"/> | <input type="radio"/> | <input type="radio"/>              |
| 5. I found it difficult to work up the initiative to do things                                                                | <input type="radio"/> | <input type="radio"/> | <input type="radio"/> | <input type="radio"/>              |
| 6. I tended to over-react to situations                                                                                       | <input type="radio"/> | <input type="radio"/> | <input type="radio"/> | <input type="radio"/>              |
| 7. I experienced trembling (e.g., in the hands)                                                                               | <input type="radio"/> | <input type="radio"/> | <input type="radio"/> | <input type="radio"/>              |
| 8. I felt that I was using a lot of nervous energy                                                                            | <input type="radio"/> | <input type="radio"/> | <input type="radio"/> | <input type="radio"/>              |
| 9. I was worried about situations in which I might panic and make a fool of myself                                            | <input type="radio"/> | <input type="radio"/> | <input type="radio"/> | <input type="radio"/>              |
| 10. I felt that I had nothing to look forward to                                                                              | <input type="radio"/> | <input type="radio"/> | <input type="radio"/> | <input type="radio"/>              |

|                                                                                                                                          |                       |                       |                       |                       |
|------------------------------------------------------------------------------------------------------------------------------------------|-----------------------|-----------------------|-----------------------|-----------------------|
| 11. I found myself getting agitated                                                                                                      | <input type="radio"/> | <input type="radio"/> | <input type="radio"/> | <input type="radio"/> |
| 12. I found it difficult to relax                                                                                                        | <input type="radio"/> | <input type="radio"/> | <input type="radio"/> | <input type="radio"/> |
| 13. I felt downhearted and blue                                                                                                          | <input type="radio"/> | <input type="radio"/> | <input type="radio"/> | <input type="radio"/> |
| 14. I was intolerant of anything that kept me from getting on with what I was doing                                                      | <input type="radio"/> | <input type="radio"/> | <input type="radio"/> | <input type="radio"/> |
| 15. I felt I was close to panic                                                                                                          | <input type="radio"/> | <input type="radio"/> | <input type="radio"/> | <input type="radio"/> |
| 16. I was unable to become enthusiastic about anything                                                                                   | <input type="radio"/> | <input type="radio"/> | <input type="radio"/> | <input type="radio"/> |
| 17. I felt I wasn't worth much as a person                                                                                               | <input type="radio"/> | <input type="radio"/> | <input type="radio"/> | <input type="radio"/> |
| 18. I felt that I was rather touchy                                                                                                      | <input type="radio"/> | <input type="radio"/> | <input type="radio"/> | <input type="radio"/> |
| 19. I was aware of the action of my heart in the absence of physical exertion (e.g., sense of heart rate increase, heart missing a beat) | <input type="radio"/> | <input type="radio"/> | <input type="radio"/> | <input type="radio"/> |
| 20. I felt scared without any good reason                                                                                                | <input type="radio"/> | <input type="radio"/> | <input type="radio"/> | <input type="radio"/> |
| 21. I felt that life was meaningless                                                                                                     | <input type="radio"/> | <input type="radio"/> | <input type="radio"/> | <input type="radio"/> |

## II. TASK: Link to the Pavlovia Page

---

### Start of Block: Link to the task (video inside)

Here I ask you to add an alphanumeric code (ID\_Subject) through which your responses to the questionnaire and the experiment will be associated, in a totally anonymous way. The code, that you will insert at the beginning of the experimental task you will find through the following link, will be composed of the initial letters of your name and surname, your age, gender in which you identify yourself (please write F, M, or A for other) and the day of the month in which you are performing the experiment (es. Mario Rossi, age 23, gender M, experiment performed the 3<sup>rd</sup> of october: MR23M3).

---

Here's the link to start the experiment:

[https://run.pavlovia.org/Stefano\\_PhD/thai\\_nega/html](https://run.pavlovia.org/Stefano_PhD/thai_nega/html)

Remember to add the code you just created as your "ID\_Subject". Once the task is finished, come back to this page to answer to some final questions.

---

## III. Questionnaire – Part 2

Experience with the pandemic

Have you ever contracted COVID-19?

YES

NO

Are you currently positive to COVID-19?

YES

NO

If so, which symptoms are/were associated with COVID-19? (*You can select multiple responses*)

- Fever
- Cough
- Breathing difficulties
- Sense of tiredness/weakness
- None of these symptoms

Have you had other symptoms associated with COVID-19? (*You can select multiple responses*)

- Soreness, muscle aches
- Nasal Congestion
- Runny nose
- Sore throat
- Diarrhea
- Difficulty to perceive smells
- Difficulty to perceive flavors
- Greater/Lesser tactile sensitivity
- Hearing difficulties
- Visual Difficulties (such as “seeing double”, red/dry eyes, frequent tearing)

None of the above

---

In which situation are you, regarding the dispositions and closures related to the COVID-19 pandemic emergency?

- No restrictions (white zone)
  - I can go outside, but with some limits/restrictions (yellow/orange zone)
  - I can go outside only if strictly necessary (red zone)
  - I cannot go outside (total isolation/ quarantine)
- 

If you are in quarantine, how many days have you spent in this situation?

---

How scared are you of being infected with COVID-19?

- In no way
  - A little
  - Mildly
  - I'm quite worried
  - A lot
- 

How often do you look for information about it?

- Never
  - Rarely
  - Once per week
  - Several times per week
  - Every day
- 

Do you know someone that contracted COVID-19?

|                     | YES                   | NO                    |
|---------------------|-----------------------|-----------------------|
| Relative or partner | <input type="radio"/> | <input type="radio"/> |
| Friend              | <input type="radio"/> | <input type="radio"/> |
| Acquaintance        | <input type="radio"/> | <input type="radio"/> |

---



Do you know someone that died due to COVID-19?

|                     | YES                   | NO                    |
|---------------------|-----------------------|-----------------------|
| Relative or partner | <input type="radio"/> | <input type="radio"/> |
| Friend              | <input type="radio"/> | <input type="radio"/> |
| Acquaintance        | <input type="radio"/> | <input type="radio"/> |

---

Have you been vaccinated against COVID-19?

- Yes, I completed the first cycle and received the third dose as well
- Yes, I completed the first cycle (two doses)
- Yes, but I haven't completed the cycle yet (one dose out of two)
- No, but I am planning to do it
- No, I will not do it

The following questions refer to your level of well-being

INSTRUCTIONS: Referring to the current situation, characterized by the COVID-19 epidemic and the social distancing measures put in place to contain it, indicate how you feel for each of the following dimensions.

|                                                                                                                           | <b>Not at all</b>     | <b>A little</b>       | <b>Mildly</b>         | <b>Quite a lot</b>    | <b>Extremely</b>      |
|---------------------------------------------------------------------------------------------------------------------------|-----------------------|-----------------------|-----------------------|-----------------------|-----------------------|
| 1. Having repeated, disturbing, unwanted thoughts about this stressful experience                                         | <input type="radio"/> | <input type="radio"/> | <input type="radio"/> | <input type="radio"/> | <input type="radio"/> |
| 2. Having repeated, disturbing dreams related to this stressful experience                                                | <input type="radio"/> | <input type="radio"/> | <input type="radio"/> | <input type="radio"/> | <input type="radio"/> |
| 3. Feeling very upset                                                                                                     | <input type="radio"/> | <input type="radio"/> | <input type="radio"/> | <input type="radio"/> | <input type="radio"/> |
| 4. Having strong physical reactions thinking about this stressful experience (e.g., pounding heart, difficulty breathing) | <input type="radio"/> | <input type="radio"/> | <input type="radio"/> | <input type="radio"/> | <input type="radio"/> |
| 5. Try to avoid thoughts and feelings related to this stressful experience                                                | <input type="radio"/> | <input type="radio"/> | <input type="radio"/> | <input type="radio"/> | <input type="radio"/> |
| 6. Having difficulty thinking about other aspects of this stressful situation                                             | <input type="radio"/> | <input type="radio"/> | <input type="radio"/> | <input type="radio"/> | <input type="radio"/> |
| 7. Having trouble concentrating                                                                                           | <input type="radio"/> | <input type="radio"/> | <input type="radio"/> | <input type="radio"/> | <input type="radio"/> |

8. Having trouble falling asleep

9. Having a disturbed sleep

---

Page Break

The current pandemic situation has changed various aspects of our daily lives. How would you rate the impact of COVID-19 on the following aspects of your life?

Rate it on a scale ranging from 0 (no impact) to 5 (strong impact).

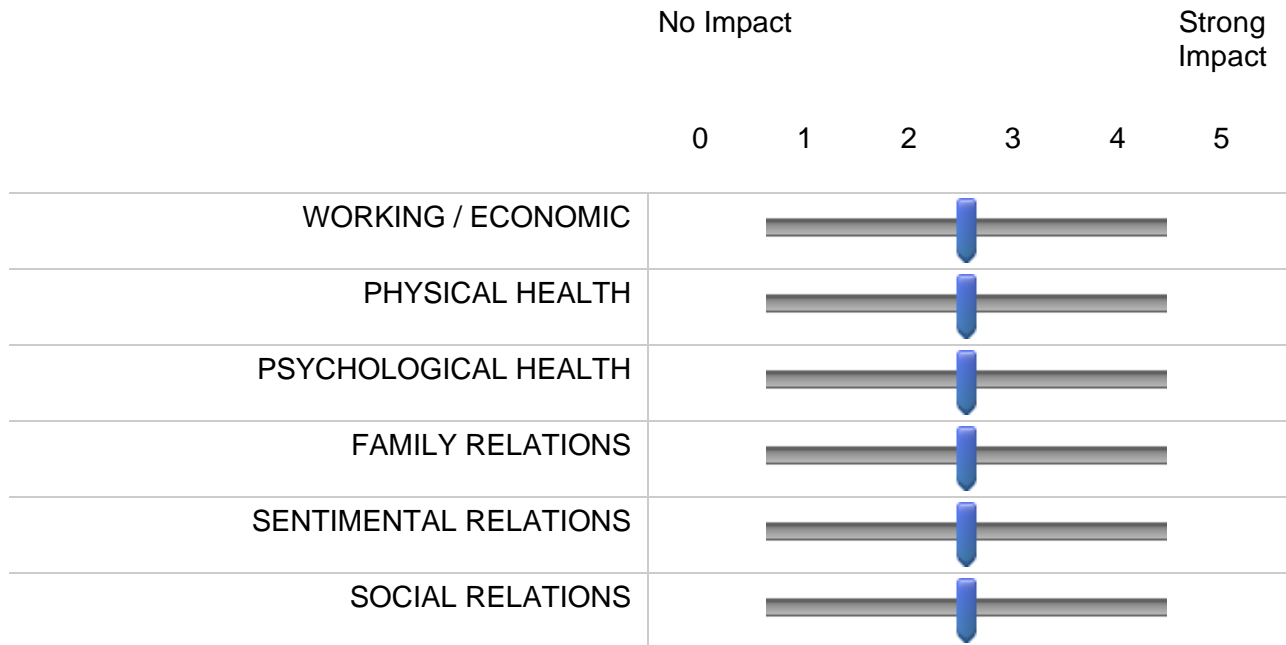

Have you ever been followed on a psychological level before the pandemic?

YES

NO

Have you sought psychological help during the pandemic?

YES

NO

Would you like to seek psychological help in the future?

YES

NO
